# Supplementary material for: Clonal Analysis of Gliogenesis in the Cerebral Cortex Reveals Stochastic Expansion of Glia and Cell Autonomous Responses to Egfr Dosage
Source: MDPI journal article supplement (doi:10.3390/cells9122662), 2020-12-11
Supplement: s1 [file s1]

# Supplementary Figures

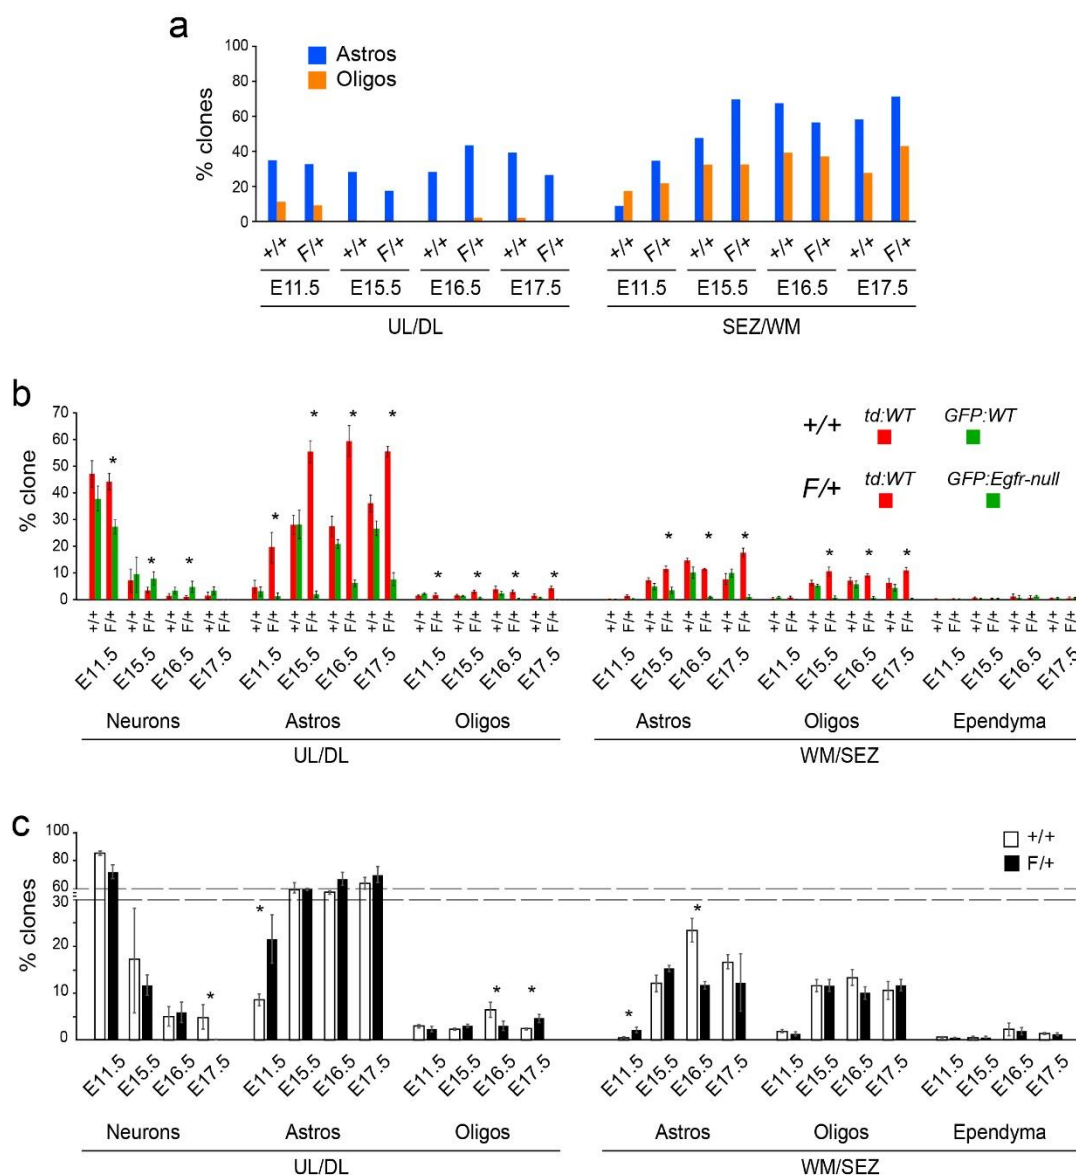

**Figure S1. Astrocyte versus oligodendrocyte fates in MADM clones.** (a) Percentages of MADM clones containing astrocytes and/or oligodendrocytes in the UL/DL versus SEZ/WM of dorsolateral cortices at various induction times and genotypes. (b) Percentages of cell types in +/+ and F/+ cortices at different induction times broken down by red and green MADM distributions in the UL/DL or SEZ/WM of the cortex as indicated. (c) Percentages of cell types in +/+ and F/+ cortices at different induction times with red and green MADM distributions combined in the UL/DL or SEZ/WM of the cortex as indicated. Data are mean  $\pm$  sem. \*, Student's t-test,  $P < 0.05$ .

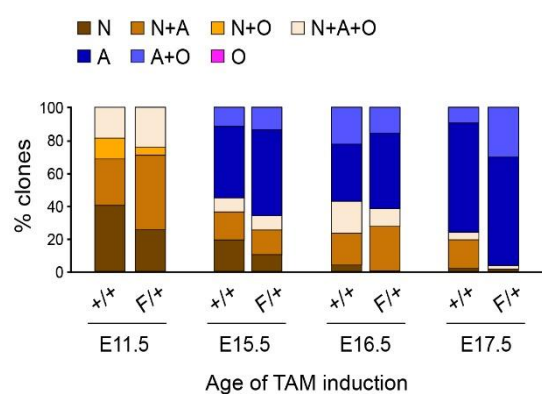

**Figure S2. Proportional distribution of lineage-restricted and multi-lineage clones in the +/+ and F/+ cortices.** Percentages of clones containing only neurons (N), astrocytes (A), or oligodendrocytes (O) in layers I-VI of the cortex. Data does not include cells in the SEZ/WM. Note no O clones were found at any age or genotype. Multi-lineage clones are presented as indicated.

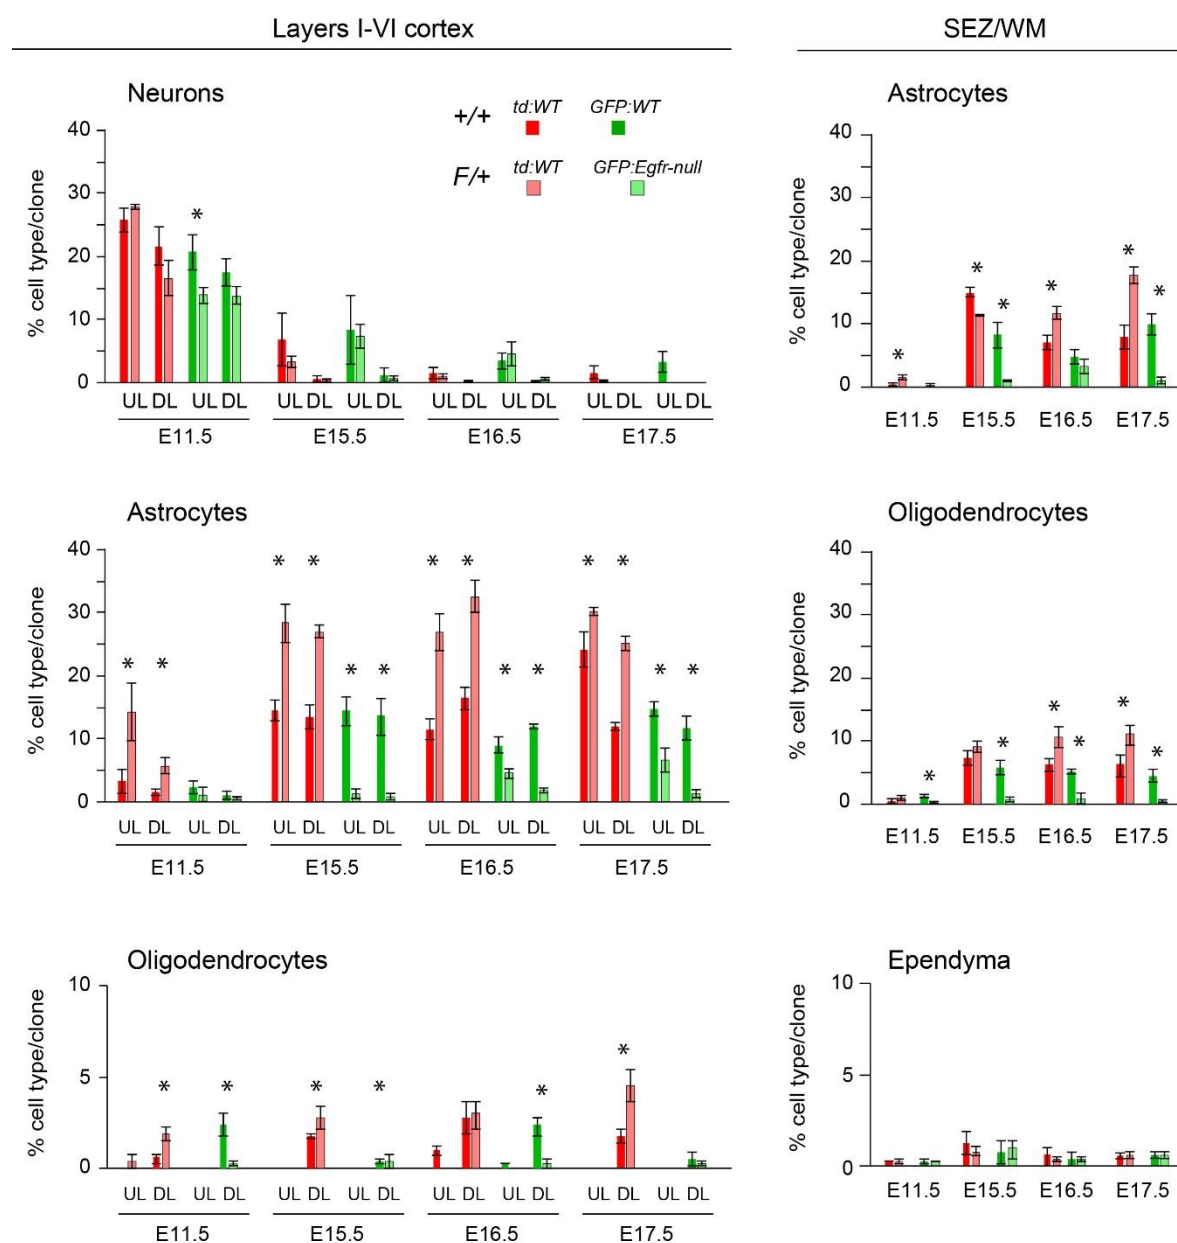

**Figure S3. Laminar distribution of glial types.** Charts illustrating average percentages of cell types per clone in the upper layers (UL), deep layers (DL) and the SEZ/WM of the cortex broken down by red and green MADM cells in +/+ and F/+ dorsolateral cortices. Data are mean  $\pm$  sem. \*, Students t-test,  $P < 0.05$ .

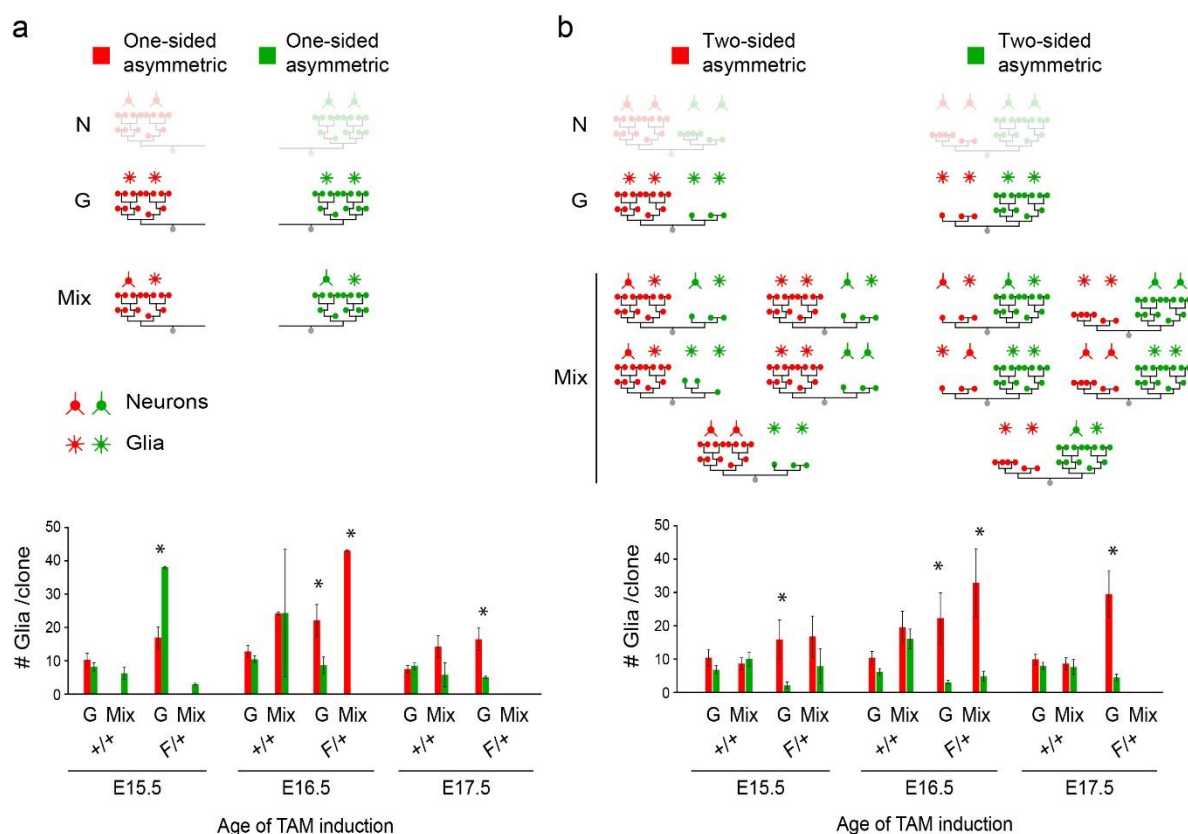

**Figure S4. Analysis of asymmetry in MADM clones during gliogenesis segregated by green and red MADM cells.** N clones were excluded since none were observed during the gliogenic period. Representative patterns of different clone types are depicted above for (a) one-sided asymmetric, and (b) two-sided asymmetric clones. Charts present average numbers of glia per clone in different clone types and genotypes. Data are mean  $\pm$  sem. \*, rank Sum test,  $P < 0.05$ .
